# Supplementary material for: Intracranial Fluid Redistribution But No White Matter Microstructural Changes During a Spaceflight Analog
Source: PubMed Central journal article supplement (PMC5466616; doi:10.1038/s41598-017-03311-w), 2017-06-09
Supplement: 41598_2017_3311_MOESM1_ESM.pdf [file 41598_2017_3311_MOESM1_ESM.pdf]

1 **Supplementary Material To:**

2 **Title:** Intracranial Fluid Redistribution But No White Matter Microstructural Changes  
3 During a Spaceflight Analog

4  
5 **Authors:** Vincent Koppelmans<sup>1</sup>, Ofer Pasternak<sup>2</sup>, Jacob J. Bloomberg<sup>3</sup>, Yiri E. De Dios<sup>4</sup>, Scott  
6 J. Wood<sup>3,5</sup>, Roy Riascos<sup>6</sup>, Patricia A. Reuter-Lorenz<sup>7</sup>, Igor S. Kofman<sup>4</sup>, Ajitkumar P.  
7 Mulavara<sup>4</sup>, Rachael D. Seidler<sup>1,7,8\*</sup>

8  
9 **Authors' affiliations:** <sup>1</sup> School of Kinesiology, University of Michigan, Ann Arbor, MI, US; <sup>2</sup>  
10 Departments of Psychiatry and Radiology, Brigham and Women's Hospital and Harvard  
11 Medical School, Boston, MA, US; <sup>3</sup> NASA Johnson Space Center, Houston, TX, US; <sup>4</sup> KBRwyle,  
12 Houston, TX, US; <sup>5</sup> Azusa Pacific University, Azusa, CA, US; <sup>6</sup> The University of Texas Health  
13 Science Center, Houston, TX, US; <sup>7</sup> Department of Psychology, University of Michigan, Ann  
14 Arbor, MI, US; <sup>8</sup> Neuroscience Program, University of Michigan, Ann Arbor, MI, US

15  
16 \* Corresponding author

17 Neuromotor Behavior Laboratory, University of Michigan

18 401 Washtenaw Ave.

19 Ann Arbor, MI, 48109-2214, US

20 [rseidler@umich.edu](mailto:rseidler@umich.edu)

# Similarities between A) Free Water Distribution Changes from pre- to post-Bed Rest, B) Gray Matter Volume Changes from pre- to post-Bed Rest, and C) Gray Matter Volume Changes from pre- to post-Spaceflight

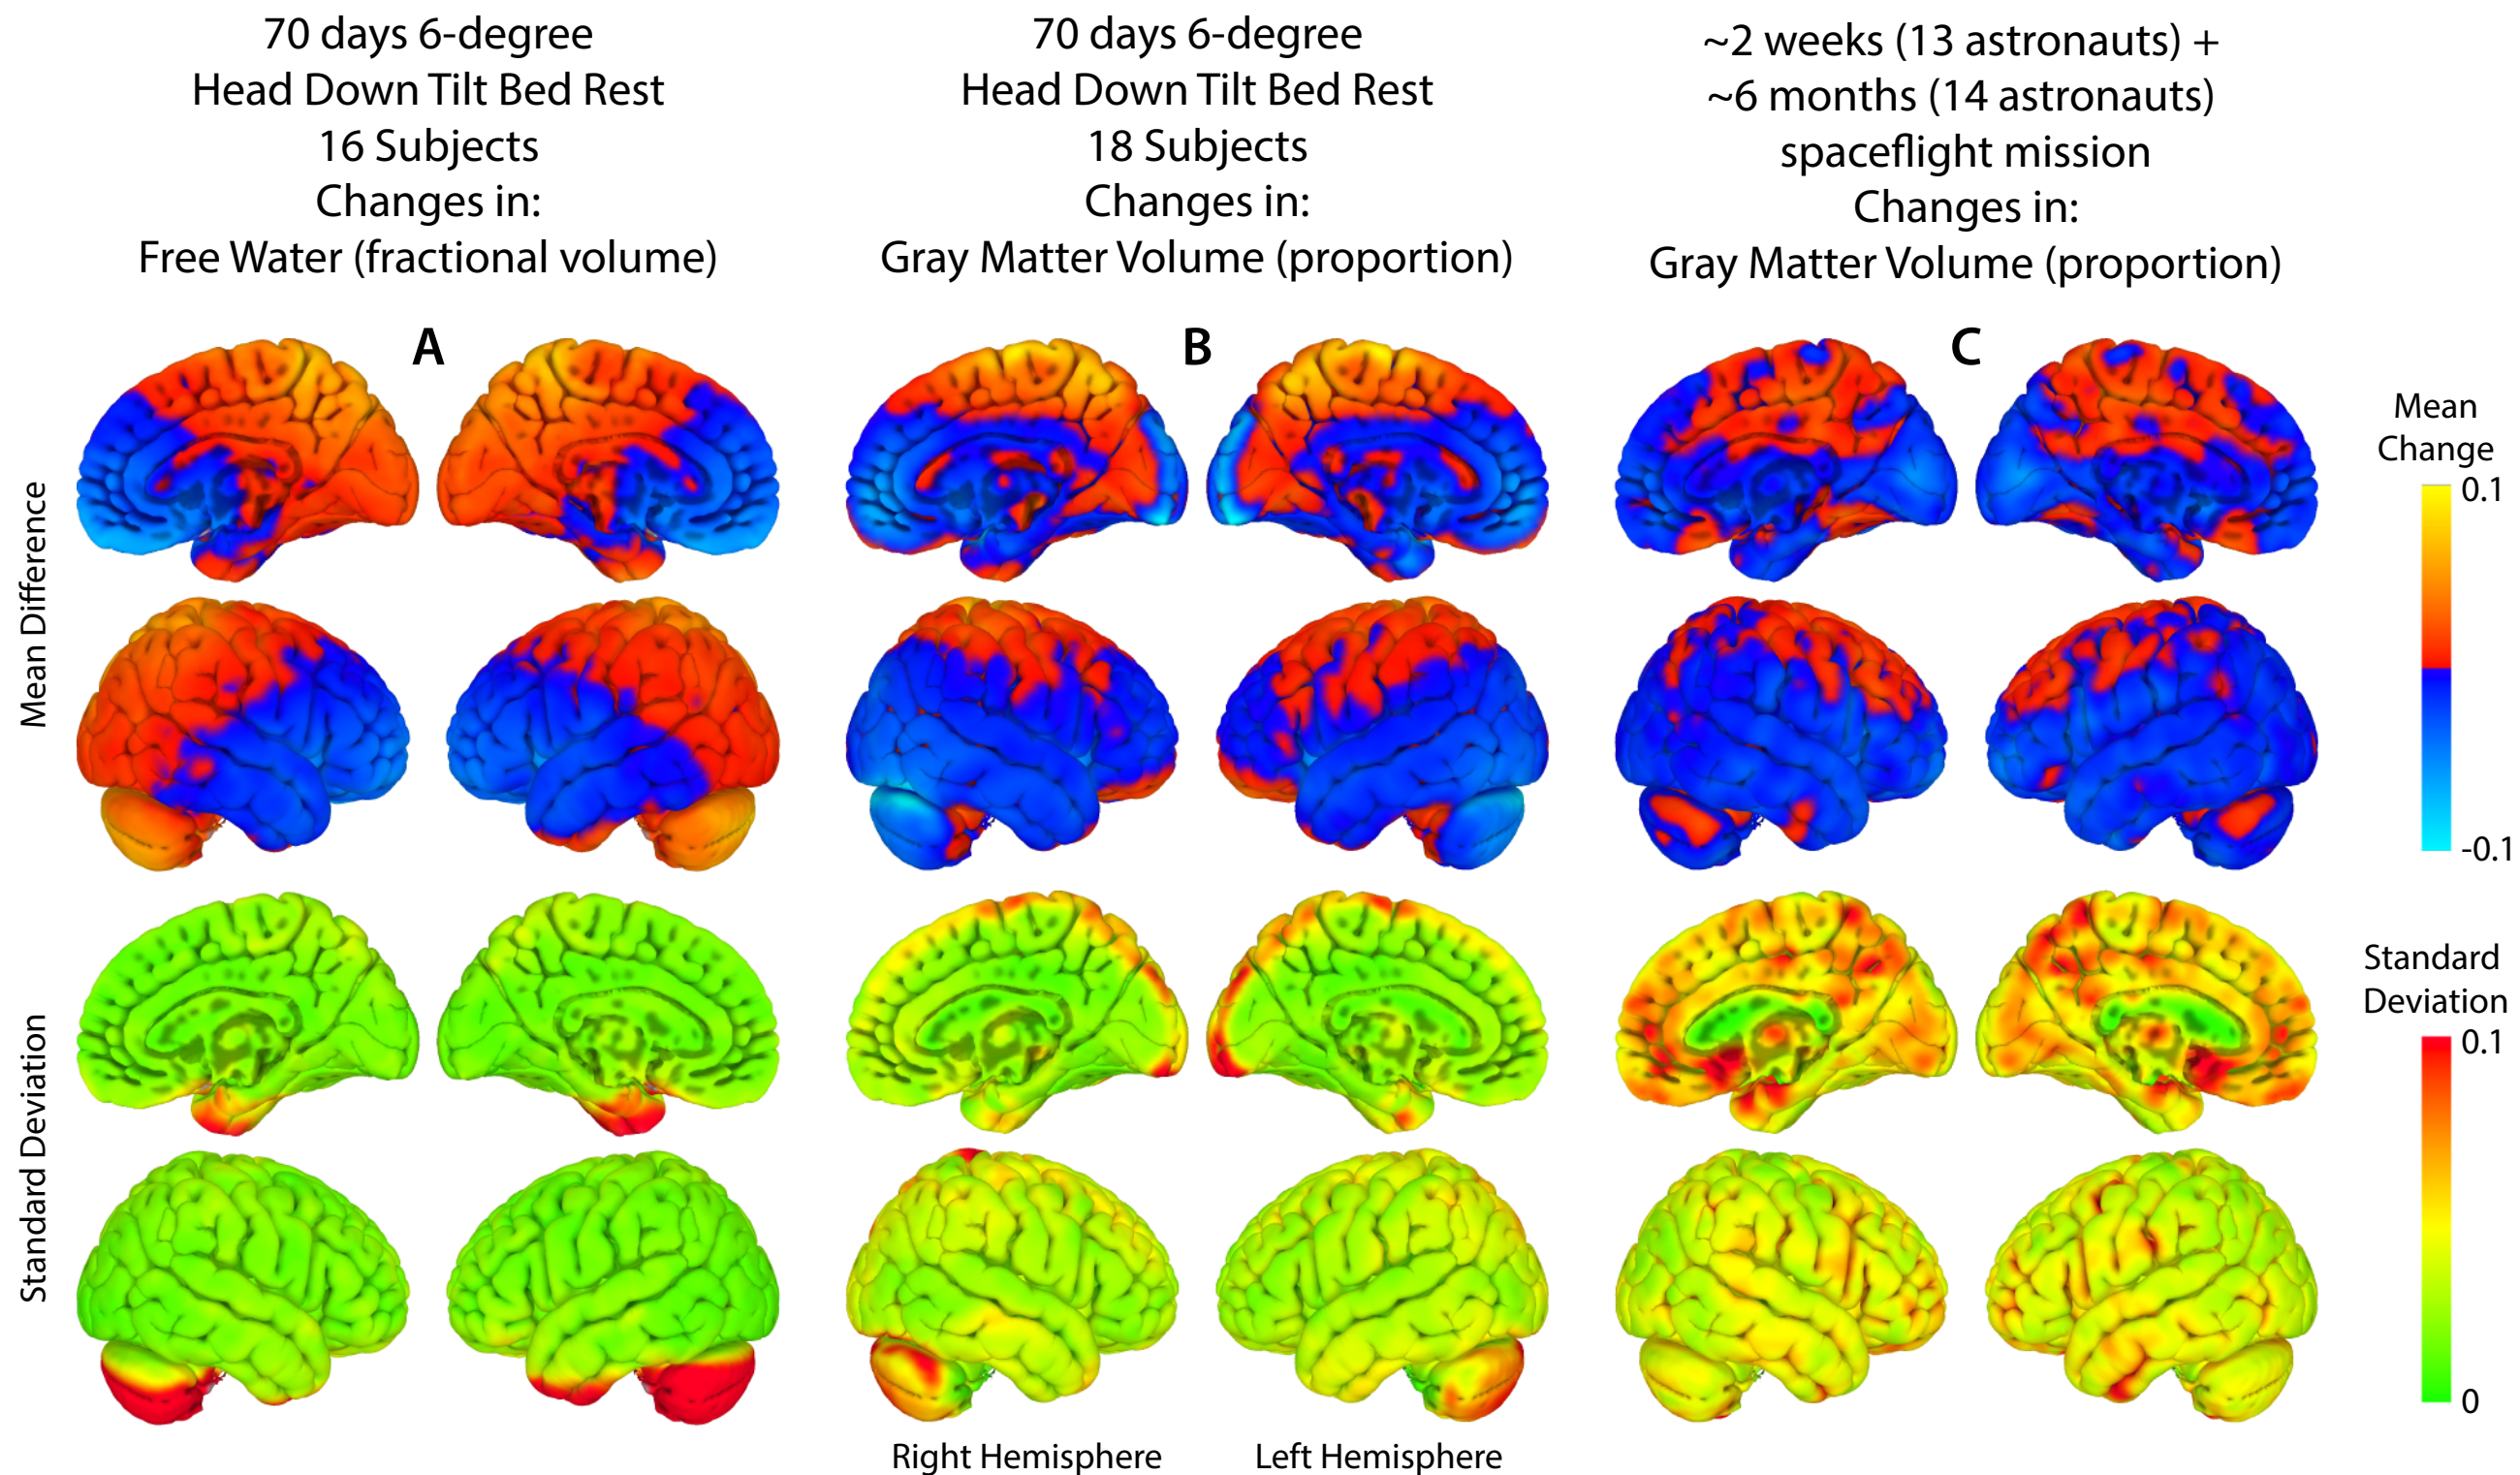

## 1 **Supplementary Figure Captions**

### 2 **Supplementary Figure 1. Qualitative comparison of Free Water and Gray Matter** 3 **changes over the course of HDBR and Gray Matter changes from pre- to post-** 4 **spaceflight**

5 Mean difference images (top 2 rows) show the average of the difference images (8 days pre-  
6 HDBR to ~70 days in HDBR, or pre-spaceflight to post-spaceflight). Standard deviation  
7 images (bottom 2 rows) show the standard deviation over the difference images of all  
8 subjects. Over groups, mean difference images and standard deviation images have been  
9 scaled identically for comparison. A (left two columns)= Free Water changes from 8 days  
10 pre-HDBR to ~70 days in HDBR (data from the current report); B (middle two columns)=  
11 Gray Matter changes from 8 days pre-HDBR to ~70 days in HDBR (Koppelmans et al., npj  
12 Microgravity 2016; doi:10.1038/s41526-016-0001-9; same participants as A); C (right two  
13 columns)= Gray Matter changes from pre- to post-Spaceflight (Koppelmans et al., npj  
14 Microgravity 2016; doi:10.1038/s41526-016-0001-9)

Supplementary tables to:

## **Intracranial Fluid Redistribution and White Matter Microstructural Changes During a Spaceflight Analog**

*Vincent Koppelmans, Ofer Pasternak, Jacob J. Bloomberg, Yiri E. De Dios, Scott J. Wood, Patricia A. Reuter-Lorenz, Igor S. Kofman, Ajitkumar P. Mulavara, Rachael D. Seidler*

**This sheet contains an overview of locations in which we observed free water changes:**

- 1) HBDR vs. Normative: Free Water Increase (non-parametric)
- 2) HDBR vs. Normative Free Water Decrease (non-parametric)
- 3)  $\Delta$  Contrast: Free Water Increase with HDBR \*
- 4)  $\Delta$  Contrast: Free Water Decrease with HDBR \*

Anatomical labels of all peak voxels with a minimum distance of 1cm within clusters showing significant (family wise error corrected) free water changes are reported. Coordinates refer to the MNI coordinate system in mm. Changes reflect changes in free water from pre-HDBR to the end of HDBR relative to changes in normative control subjects over a similar time interval.

\* The  $\Delta$  contrast is described in the manuscript (see Figure 1B). In terms of focal free water it assumes a stable baseline (no changes before bed rest) with increases/decreases during bed rest and recovery post bed rest.

Regions highlighted in green are obtained from the **Harvard-Oxford Cortical Structural Atlas**

Regions highlighted in green are obtained from the **Harvard-Oxford Subcortical Structural Atlas**

Regions highlighted in orange are obtained from the **Cerebellar Atlas in MNI152 (normalization with FNIRT)**

These atlases are bundled with Oxford Centre for Functional MRI of the Brain Software Library

<http://fsl.fmrib.ox.ac.uk/fsl/fslwiki/FSL>

<http://fsl.fmrib.ox.ac.uk/fsl/fslwiki/Atlases>

#### 4) $\Delta$ Contrast: Free Water Decrease with HDBR \*

Regions in which Free Water was stable at baseline, **DECREASED** from pre-HDBR to ~70 Days in HDBR and recovered post-HDBR (also see Figure 2B)

| X   | Y   | Z   | Brain Region                                                        | Counts                                        |
|-----|-----|-----|---------------------------------------------------------------------|-----------------------------------------------|
| 28  | -72 | 44  | Lateral Occipital Cortex; superior division                         | 1 Angular Gyrus                               |
| 1   | -51 | 55  | Precuneous Cortex                                                   | 1 Cingulate Gyrus; anterior division          |
| 0   | -60 | 45  | Precuneous Cortex                                                   | 2 Cuneal Cortex                               |
| 1   | -41 | 59  | Precuneous Cortex                                                   | 1 Intracalcarine Cortex                       |
| 37  | -53 | 51  | Angular Gyrus                                                       | 2 Juxtapositional Lobule Cortex               |
| 12  | -77 | 36  | Cuneal Cortex                                                       | 2 Lateral Occipital Cortex; inferior division |
| -32 | -53 | 48  | Superior Parietal Lobule                                            | 7 Lateral Occipital Cortex; superior division |
| -26 | -73 | 42  | Lateral Occipital Cortex; superior division                         | 1 Left Crus I                                 |
| 40  | -38 | 52  | Superior Parietal Lobule                                            | 1 Lingual Gyrus                               |
| -11 | -80 | 37  | Cuneal Cortex                                                       | 2 Middle Frontal Gyrus                        |
| -23 | -29 | 65  | Postcentral Gyrus                                                   | 5 Occipital Pole                              |
| -32 | -27 | 60  | Postcentral Gyrus                                                   | 6 Postcentral Gyrus                           |
| -43 | -35 | 50  | Postcentral Gyrus                                                   | 4 Precentral Gyrus                            |
| 29  | -28 | 64  | Postcentral Gyrus                                                   | 4 Precuneous Cortex                           |
| 14  | -31 | 72  | Postcentral Gyrus                                                   | 2 Right Crus I                                |
| -2  | -76 | 32  | Precuneous Cortex                                                   | 4 Superior Parietal Lobule                    |
| -22 | -42 | 64  | Postcentral Gyrus                                                   | 1 Vermis VI                                   |
| -30 | -40 | 57  | Superior Parietal Lobule                                            |                                               |
| 25  | -40 | 63  | Superior Parietal Lobule                                            |                                               |
| 0   | -29 | 55  | Precentral Gyrus                                                    |                                               |
| -25 | -85 | 25  | Lateral Occipital Cortex; superior division                         |                                               |
| 24  | -90 | 23  | Occipital Pole                                                      |                                               |
| 2   | -19 | 67  | Precentral Gyrus                                                    |                                               |
| 1   | 0   | 65  | Juxtapositional Lobule Cortex (formerly Supplementary Motor Cortex) |                                               |
| -12 | -73 | 48  | Lateral Occipital Cortex; superior division                         |                                               |
| -6  | -95 | 17  | Occipital Pole                                                      |                                               |
| -41 | -14 | 49  | Precentral Gyrus                                                    |                                               |
| 2   | -89 | 20  | Occipital Pole                                                      |                                               |
| 0   | -12 | 47  | Cingulate Gyrus; anterior division                                  |                                               |
| 29  | -3  | 58  | Middle Frontal Gyrus                                                |                                               |
| 0   | 3   | 49  | Juxtapositional Lobule Cortex (formerly Supplementary Motor Cortex) |                                               |
| -8  | -94 | -2  | Occipital Pole                                                      |                                               |
| 46  | -66 | 35  | Lateral Occipital Cortex; superior division                         |                                               |
| 10  | -85 | 6   | Intracalcarine Cortex                                               |                                               |
| 37  | -87 | 2   | Lateral Occipital Cortex; inferior division                         |                                               |
| -19 | -95 | 11  | Occipital Pole                                                      |                                               |
| -1  | -70 | -22 | Vermis VI                                                           |                                               |
| 21  | -81 | -25 | Right Crus I                                                        |                                               |
| -10 | -63 | -8  | Lingual Gyrus                                                       |                                               |
| 37  | -74 | -27 | Right Crus I                                                        |                                               |
| -31 | -73 | -24 | Left Crus I                                                         |                                               |
| 43  | -13 | 44  | Precentral Gyrus                                                    |                                               |
| -45 | -63 | 27  | Lateral Occipital Cortex; superior division                         |                                               |
| -26 | -2  | 54  | Middle Frontal Gyrus                                                |                                               |
| -29 | -89 | 5   | Lateral Occipital Cortex; inferior division                         |                                               |
| -44 | -70 | 18  | Lateral Occipital Cortex; superior division                         |                                               |



### 3) $\Delta$ Contrast: Free Water Increase with HDBR \*

Regions in which Free Water was stable at baseline, **INCREASED** from pre-HDBR to ~70 Days in HDBR and recovered post-HDBR (also see Figure 2B)

| X   | Y   | Z   | Brain Region                                | Counts |
|-----|-----|-----|---------------------------------------------|--------|
| 0   | 42  | -11 | Paracingulate Gyrus                         | 3      |
| -33 | 20  | -8  | Insular Cortex                              | 1      |
| -38 | 24  | 0   | Frontal Operculum Cortex                    | 2      |
| 43  | 20  | 1   | Frontal Operculum Cortex                    | 9      |
| 29  | 55  | 2   | Frontal Pole                                | 1      |
| 38  | 45  | -11 | Frontal Pole                                | 1      |
| 34  | 35  | -12 | Frontal Pole                                | 1      |
| -25 | 55  | 1   | Frontal Pole                                | 4      |
| -28 | 38  | -11 | Frontal Pole                                | 2      |
| 1   | 38  | 6   | Cingulate Gyrus; anterior division          | 1      |
| 44  | 41  | 0   | Frontal Pole                                | 1      |
| -50 | 6   | -2  | Central Opercular Cortex                    | 1      |
| -39 | 45  | -5  | Frontal Pole                                | 1      |
| -40 | 10  | 1   | Insular Cortex                              | 3      |
| -39 | 43  | 8   | Frontal Pole                                | 2      |
| 33  | 10  | -22 | Temporal Pole                               | 3      |
| 49  | 3   | -2  | Planum Polare                               |        |
| 23  | 38  | -17 | Frontal Pole                                |        |
| 12  | 23  | 3   | Right Caudate                               |        |
| 56  | -1  | 6   | Central Opercular Cortex                    |        |
| 1   | 22  | -20 | Subcallosal Cortex                          |        |
| 54  | 13  | 9   | Inferior Frontal Gyrus; pars opercularis    |        |
| 40  | 15  | -13 | Insular Cortex                              |        |
| 1   | 16  | -8  | Subcallosal Cortex                          |        |
| -55 | -7  | 9   | Central Opercular Cortex                    |        |
| -46 | 31  | 5   | Inferior Frontal Gyrus; pars triangularis   |        |
| -36 | 16  | -26 | Temporal Pole                               |        |
| -30 | 7   | -22 | Temporal Pole                               |        |
| 17  | 4   | -21 | Parahippocampal Gyrus; anterior division    |        |
| -12 | 21  | -18 | Subcallosal Cortex                          |        |
| -43 | -3  | 9   | Insular Cortex                              |        |
| 53  | 4   | -24 | Middle Temporal Gyrus; anterior division    |        |
| 55  | -5  | -16 | Middle Temporal Gyrus; anterior division    |        |
| 48  | -2  | -36 | Inferior Temporal Gyrus; anterior division  |        |
| 62  | -18 | -4  | Superior Temporal Gyrus; posterior division |        |
| -55 | -12 | -10 | Superior Temporal Gyrus; posterior division |        |

## 2) HDBR vs. Normative Free Water Decrease (non-parametric)

Regions with Focal Free Water **DECREASES** from pre-HDBR to ~70 Days in HDBR relative to Free Water Changes in Normative Subjects over a similar time course (also see Figure 2A)

| X   | Y   | Z   | Brain Region                                                        | Counts |
|-----|-----|-----|---------------------------------------------------------------------|--------|
| 30  | -75 | 44  | Lateral Occipital Cortex; superior division                         | 4      |
| 36  | -51 | 53  | Superior Parietal Lobule                                            | 1      |
| -44 | -50 | 48  | Supramarginal Gyrus; posterior division                             | 1      |
| 18  | -60 | 59  | Lateral Occipital Cortex; superior division                         | 3      |
| -44 | -35 | 51  | Postcentral Gyrus                                                   | 2      |
| 42  | -43 | 54  | Superior Parietal Lobule                                            | 1      |
| -6  | -73 | 29  | Precuneous Cortex                                                   | 3      |
| 2   | -46 | 46  | Precuneous Cortex                                                   | 11     |
| 9   | -77 | 34  | Cuneal Cortex                                                       | 2      |
| -10 | -82 | 36  | Cuneal Cortex                                                       | 2      |
| -25 | -71 | 44  | Lateral Occipital Cortex; superior division                         | 2      |
| -2  | -37 | 44  | Cingulate Gyrus; posterior division                                 | 2      |
| -32 | -26 | 60  | Postcentral Gyrus                                                   | 8      |
| -33 | -43 | 57  | Superior Parietal Lobule                                            | 1      |
| -19 | -52 | 62  | Superior Parietal Lobule                                            | 8      |
| -19 | -27 | 61  | Precentral Gyrus                                                    | 5      |
| -23 | -38 | 62  | Postcentral Gyrus                                                   | 5      |
| 31  | -38 | 57  | Postcentral Gyrus                                                   | 2      |
| 49  | -50 | 44  | Angular Gyrus                                                       | 1      |
| -15 | -31 | 71  | Postcentral Gyrus                                                   | 4      |
| 0   | -62 | 43  | Precuneous Cortex                                                   | 5      |
| 14  | -50 | 66  | Superior Parietal Lobule                                            | 2      |
| -17 | -72 | 50  | Lateral Occipital Cortex; superior division                         | 1      |
| -19 | -61 | 57  | Lateral Occipital Cortex; superior division                         | 1      |
| 0   | -86 | 31  | Cuneal Cortex                                                       | 2      |
| -27 | -84 | 24  | Lateral Occipital Cortex; superior division                         |        |
| 32  | -28 | 62  | Postcentral Gyrus                                                   |        |
| -43 | -67 | 32  | Lateral Occipital Cortex; superior division                         |        |
| 4   | -40 | 64  | Postcentral Gyrus                                                   |        |
| -3  | -94 | 11  | Occipital Pole                                                      |        |
| 32  | -83 | 23  | Lateral Occipital Cortex; superior division                         |        |
| -2  | -60 | 61  | Precuneous Cortex                                                   |        |
| 1   | -4  | 55  | Juxtapositional Lobule Cortex (formerly Supplementary Motor Cortex) |        |
| -17 | -88 | 26  | Lateral Occipital Cortex; superior division                         |        |
| -10 | -94 | -1  | Occipital Pole                                                      |        |
| 21  | -91 | 24  | Occipital Pole                                                      |        |
| 11  | -85 | 4   | Intracalcarine Cortex                                               |        |
| 2   | -10 | 46  | Cingulate Gyrus; anterior division                                  |        |
| 10  | -96 | 13  | Occipital Pole                                                      |        |
| -13 | -84 | 2   | Intracalcarine Cortex                                               |        |
| -15 | -67 | 23  | Precuneous Cortex                                                   |        |
| -41 | -14 | 47  | Precentral Gyrus                                                    |        |
| 20  | -98 | -1  | Occipital Pole                                                      |        |
| -2  | -20 | 71  | Precentral Gyrus                                                    |        |
| 2   | -31 | 68  | Precentral Gyrus                                                    |        |
| -21 | -95 | -3  | Occipital Pole                                                      |        |
| 23  | -97 | 9   | Occipital Pole                                                      |        |
| 18  | -31 | 60  | Precentral Gyrus                                                    |        |
| 55  | -40 | 41  | Supramarginal Gyrus; posterior division                             |        |
| -11 | 14  | 65  | Superior Frontal Gyrus                                              |        |
| 16  | -31 | 73  | Postcentral Gyrus                                                   |        |
| -27 | -90 | 5   | Lateral Occipital Cortex; inferior division                         |        |
| 55  | -60 | 29  | Lateral Occipital Cortex; superior division                         |        |
| -5  | 23  | 62  | Superior Frontal Gyrus                                              |        |
| -17 | -96 | 8   | Occipital Pole                                                      |        |
| 54  | -47 | 28  | Angular Gyrus                                                       |        |
| -15 | -10 | 70  | Superior Frontal Gyrus                                              |        |
| -52 | -51 | 33  | Angular Gyrus                                                       |        |
| 43  | -65 | 41  | Lateral Occipital Cortex; superior division                         |        |
| 8   | 8   | 68  | Superior Frontal Gyrus                                              |        |
| -46 | -59 | 21  | Angular Gyrus                                                       |        |
| -14 | 8   | 39  | Paracingulate Gyrus                                                 |        |
| -36 | -82 | 7   | Lateral Occipital Cortex; inferior division                         |        |
| 40  | -81 | 8   | Lateral Occipital Cortex; inferior division                         |        |
| -17 | -77 | -23 | Left Crus I                                                         |        |
| -3  | -65 | -18 | Vermis VI                                                           |        |
| 5   | -62 | -10 | Right V                                                             |        |
| 28  | -79 | -31 | Right Crus I                                                        |        |
| 14  | -83 | -25 | Right Crus I                                                        |        |
| -13 | -62 | -9  | Lingual Gyrus                                                       |        |
| -12 | -72 | -15 | Left VI                                                             |        |
| 1   | -73 | -34 | Vermis Crus II                                                      |        |
| -23 | -69 | -22 | Left VI                                                             |        |
| -32 | -75 | -24 | Left Crus I                                                         |        |
| 18  | -67 | -13 | Lingual Gyrus                                                       |        |
| -2  | -78 | -16 | Vermis VI                                                           |        |
| 38  | -72 | -16 | Occipital Fusiform Gyrus                                            |        |
| -24 | -87 | -17 | Occipital Fusiform Gyrus                                            |        |
| -47 | -60 | -22 | Temporal Occipital Fusiform Cortex                                  |        |

## 1) HBDR vs. Normative: Free Water Increase (non-parametric)

Regions with Focal Free Water **INCREASES** from pre-HBDR to ~70 Days in HBDR relative to Free Water Changes in Normative Subjects over a similar time course (also see Figure 2A)

| X   | Y   | Z   | Brain Region                                | Counts |
|-----|-----|-----|---------------------------------------------|--------|
| -43 | 32  | -2  | Frontal Orbital Cortex                      | 2      |
| -1  | 52  | -13 | Frontal Medial Cortex                       | 1      |
| 42  | 43  | -2  | Frontal Pole                                | 2      |
| -47 | 21  | 4   | Frontal Operculum Cortex                    | 1      |
| 0   | 52  | 4   | Paracingulate Gyrus                         | 3      |
| 50  | 20  | 8   | Inferior Frontal Gyrus; pars opercularis    | 17     |
| 39  | 21  | -8  | Frontal Orbital Cortex                      | 2      |
| 0   | 40  | -19 | Frontal Medial Cortex                       | 2      |
| -27 | 40  | -9  | Frontal Pole                                | 3      |
| 35  | 55  | 4   | Frontal Pole                                | 2      |
| -37 | 46  | 7   | Frontal Pole                                | 1      |
| -46 | 30  | 13  | Inferior Frontal Gyrus; pars triangularis   | 4      |
| 8   | 49  | 14  | Paracingulate Gyrus                         | 1      |
| -25 | 56  | 3   | Frontal Pole                                | 2      |
| -35 | 19  | -7  | Insular Cortex                              | 1      |
| 32  | 33  | -11 | Frontal Orbital Cortex                      | 1      |
| -35 | 49  | -8  | Frontal Pole                                | 3      |
| 23  | 57  | -5  | Frontal Pole                                |        |
| 42  | 42  | 9   | Frontal Pole                                |        |
| 53  | 7   | -20 | Temporal Pole                               |        |
| 53  | 9   | 8   | Precentral Gyrus                            |        |
| 1   | 37  | 4   | Cingulate Gyrus; anterior division          |        |
| -29 | 54  | 12  | Frontal Pole                                |        |
| 66  | -23 | -13 | Middle Temporal Gyrus; posterior division   |        |
| 49  | 31  | 15  | Inferior Frontal Gyrus; pars triangularis   |        |
| 59  | -5  | -12 | Middle Temporal Gyrus; anterior division    |        |
| -40 | 10  | 1   | Insular Cortex                              |        |
| 50  | 6   | -4  | Planum Polare                               |        |
| 53  | -1  | 7   | Central Opercular Cortex                    |        |
| 14  | 58  | -10 | Frontal Pole                                |        |
| 24  | 40  | -14 | Frontal Pole                                |        |
| 55  | -6  | -31 | Middle Temporal Gyrus; anterior division    |        |
| -52 | 10  | 8   | Inferior Frontal Gyrus; pars opercularis    |        |
| -2  | 44  | 26  | Paracingulate Gyrus                         |        |
| 15  | 63  | 11  | Frontal Pole                                |        |
| -54 | -6  | 7   | Central Opercular Cortex                    |        |
| 63  | -10 | -4  | Superior Temporal Gyrus; posterior division |        |
| -9  | 61  | 14  | Frontal Pole                                |        |
| -52 | 8   | -2  | Temporal Pole                               |        |
| 10  | 45  | 26  | Paracingulate Gyrus                         |        |
| -30 | 46  | 27  | Frontal Pole                                |        |
| 19  | 60  | 22  | Frontal Pole                                |        |
| 14  | 64  | 1   | Frontal Pole                                |        |
| 24  | 2   | -16 | Right Amygdala                              |        |
| 41  | 14  | -27 | Temporal Pole                               |        |
| 30  | 42  | 30  | Frontal Pole                                |        |
| -38 | 8   | -16 | Insular Cortex                              |        |
| 59  | 2   | 15  | Precentral Gyrus                            |        |
